# Supplementary material for: Exposure to environmental pollutants selects for xenobiotic-degrading functions in the human gut microbiome
Source: PubMed Central journal article supplement (PMC11130323; doi:10.1038/s41467-024-48739-7), 2024-05-27
Supplement: 41467_2024_48739_MOESM3_ESM.pdf [file 41467_2024_48739_MOESM3_ESM.pdf]

## **Description of Additional Supplementary Files**

**File name: Supplementary Data S1.**

**Description:** Subject metadata and blood concentration of dioxins and heavy metals.

**File name: Supplementary Data S2.**

**Description:** List of significantly different taxa between HIGH, MEDIUM and LOW groups. p-value was computed using pairwise Wilcoxon's tests and corrected using the False Discovery Rate approach.

**File name: Supplementary data S3.**

**Description:** Number of MAGs reconstructed in this study and taxonomic identification.

**File name: Supplementary Data S4.**

**Description:** Number of reads and assembly statistics
